# Supplementary material for: Functional phosphoproteomic profiling of phosphorylation sites in membrane fractions of salt-stressed Arabidopsis thaliana
Source: PubMed Central journal article supplement (PMC2778640; doi:10.1186/1477-5956-7-42), 2009-11-10

# Supplemental Figure 1. MS/MS spectrum of SLGpSFRpSAANV (PIP22\_ARATH)

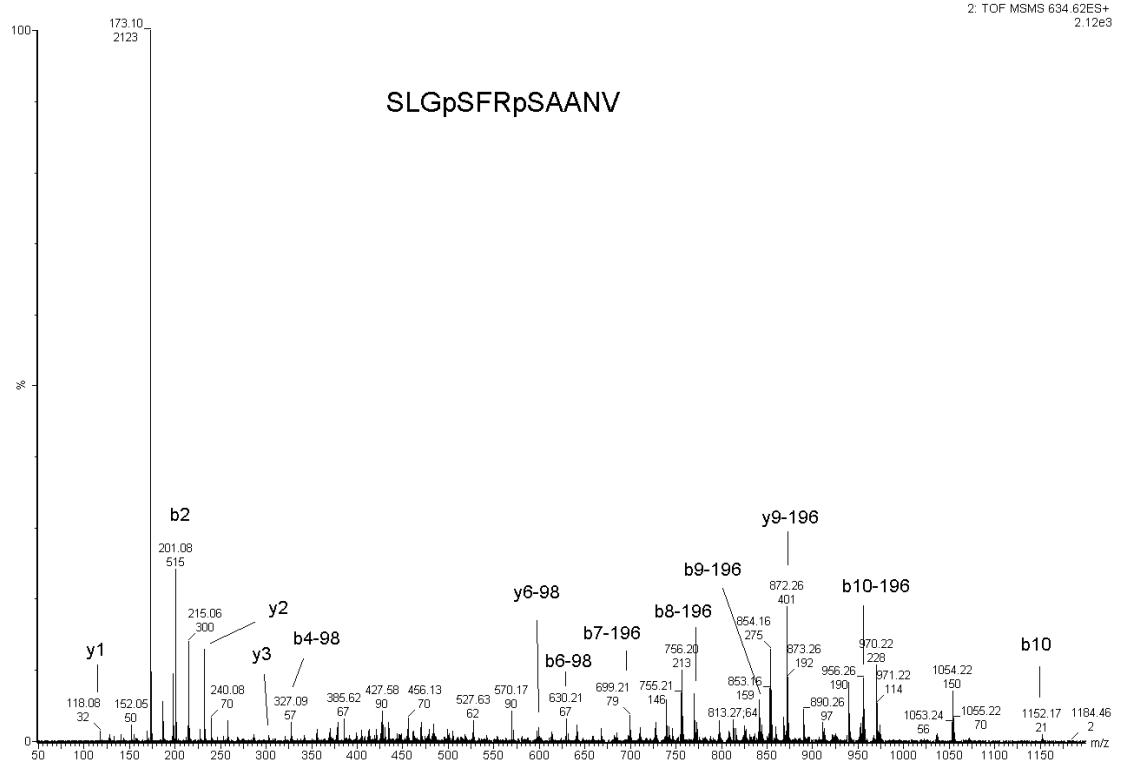

**Supplemental Figure 2. MS/MS spectrum of QTTAEGSANPEPDQILpSPR (PUP18\_ARATH)**

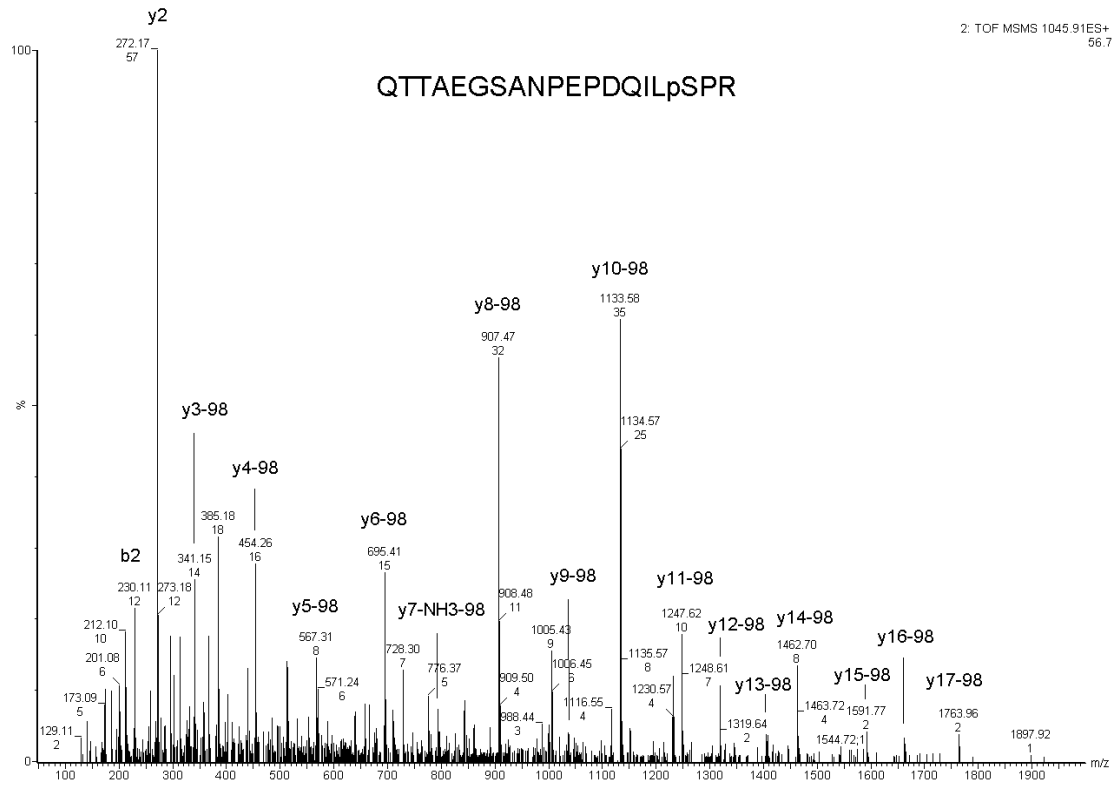

**Supplemental Figure 3. MS/MS spectrum of LIEEVSHSSGSPNPVpSD and LIEEVSHSSGpSPNPVSD mixture (Y3288\_ARATH)**

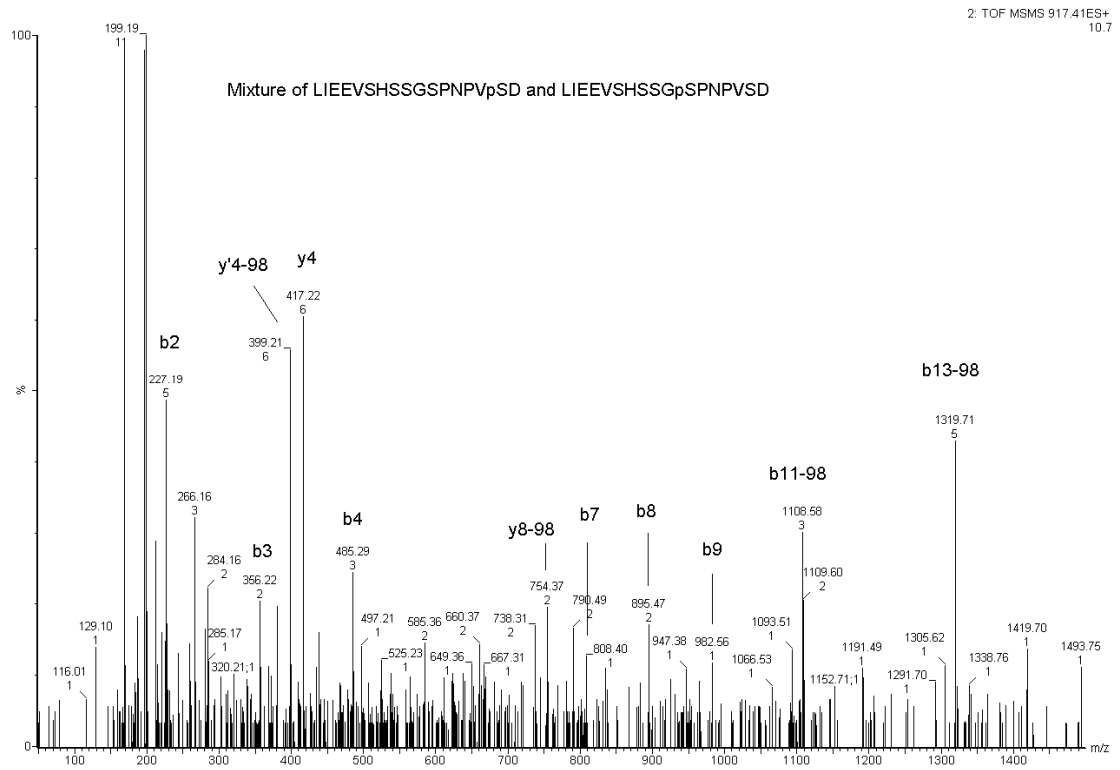

**Supplemental Figure 4. MS/MS spectrum of ILQSEpSFKEEGYLASELQAEK (PATL2\_ARATH)**

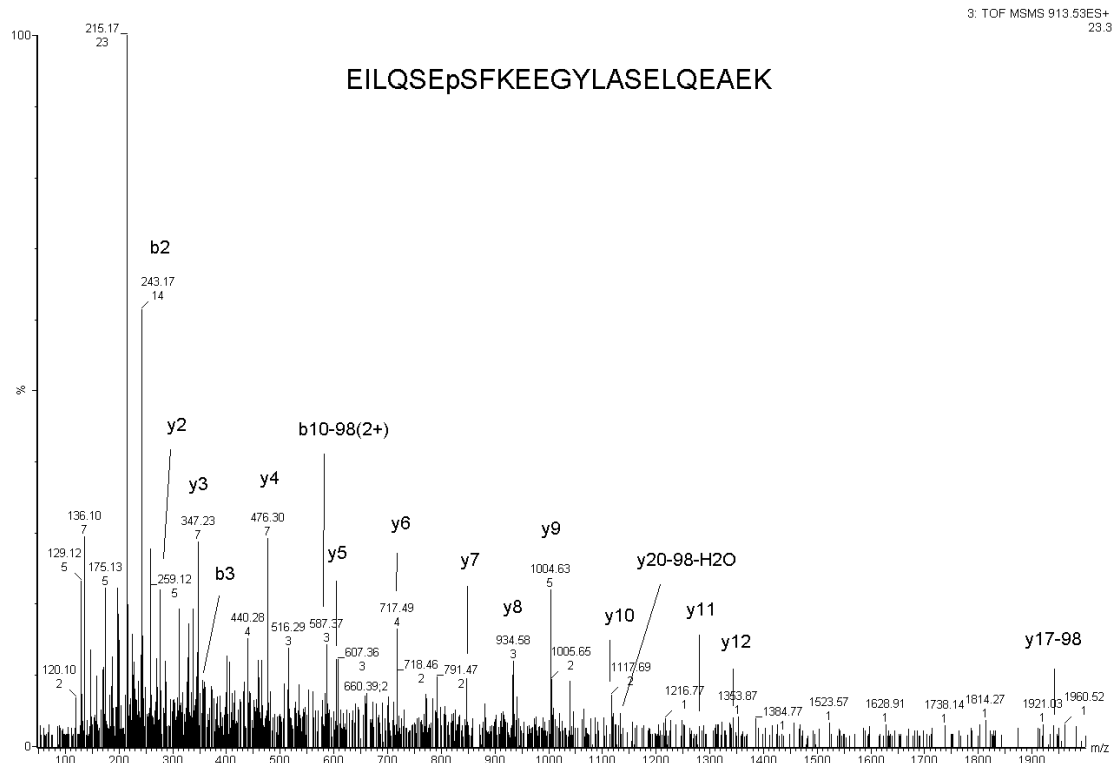

**Supplemental Figure 5. MS/MS spectrum of GLDIDTAGHHYpTV (PMA1\_ARATH)**

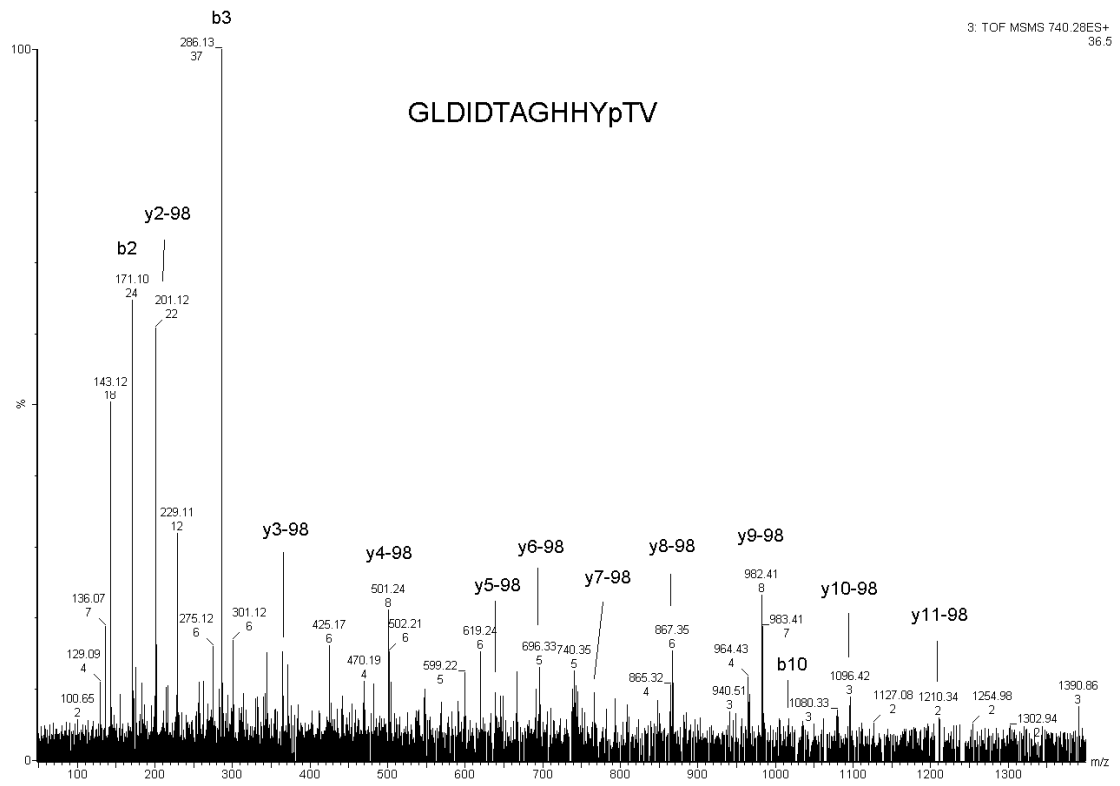

**Supplemental Figure 6. MS/MS spectrum of DNDVPVpSYSGSGGPTK  
(Y1515\_ARATH)**

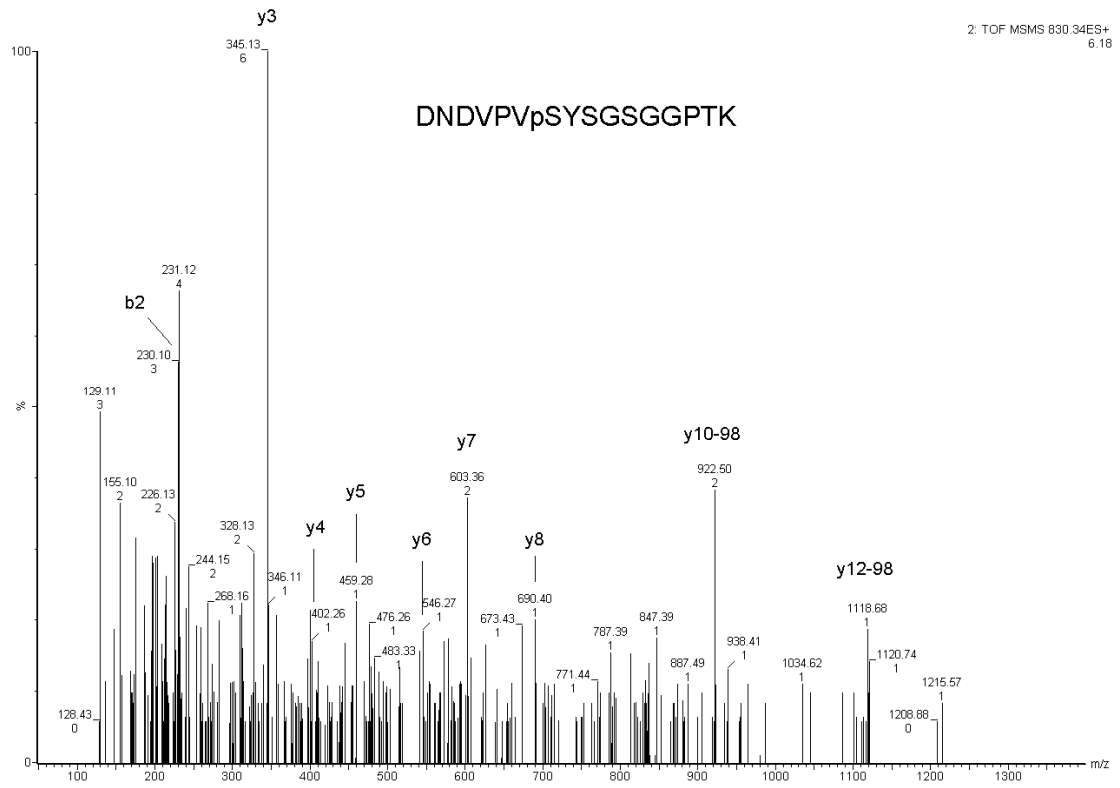

Supplement: 1477-5956-7-42-S3.pdf [file 1477-5956-7-42-S3.pdf]
